# Supplementary material
Source: Springer Nature journal article supplement (https://www.springermedizin.de/resource/supplementary/13075_2004_1619_MOESM2_ESM.pdf/9690192)
Supplement: MOESM2 [file 9690192]

**Routine cohort****Inception cohort****Routine cohort**

|                     |                     |                     |                     |
|---------------------|---------------------|---------------------|---------------------|
| <b>DAS28</b>        | 0.91<br>(0.90-0.92) | 0.89<br>(0.87-0.91) | 0.47<br>(0.41-0.53) |
| 0.90<br>(0.86-0.93) | <b>SDAI</b>         | 0.98<br>(0.98-0.98) | 0.46<br>(0.40-0.52) |
| 0.89<br>(0.84-0.92) | 0.94<br>(0.91-0.96) | <b>CDAI</b>         | 0.45<br>(0.39-0.51) |
| 0.26<br>(0.07-0.43) | 0.31<br>(0.13-0.47) | 0.30<br>(0.11-0.47) | <b>HAQ</b>          |

**Inception cohort**
